# Supplementary material
Source: PubMed Central journal article supplement (PMC3407689)
Supplement: NIHMS389732-supplement-1.pdf [file NIHMS389732-supplement-1.pdf]

Supplemental Information

p70S6 Kinase Phosphorylates AMPK on Serine 491

to Mediate Leptin's Effect on Food Intake

Yossi Dagon, Elizabeth Hur, Bin Zheng, Kerry Wellenstein, Lewis C. Cantley, and Barbara B. Kahn

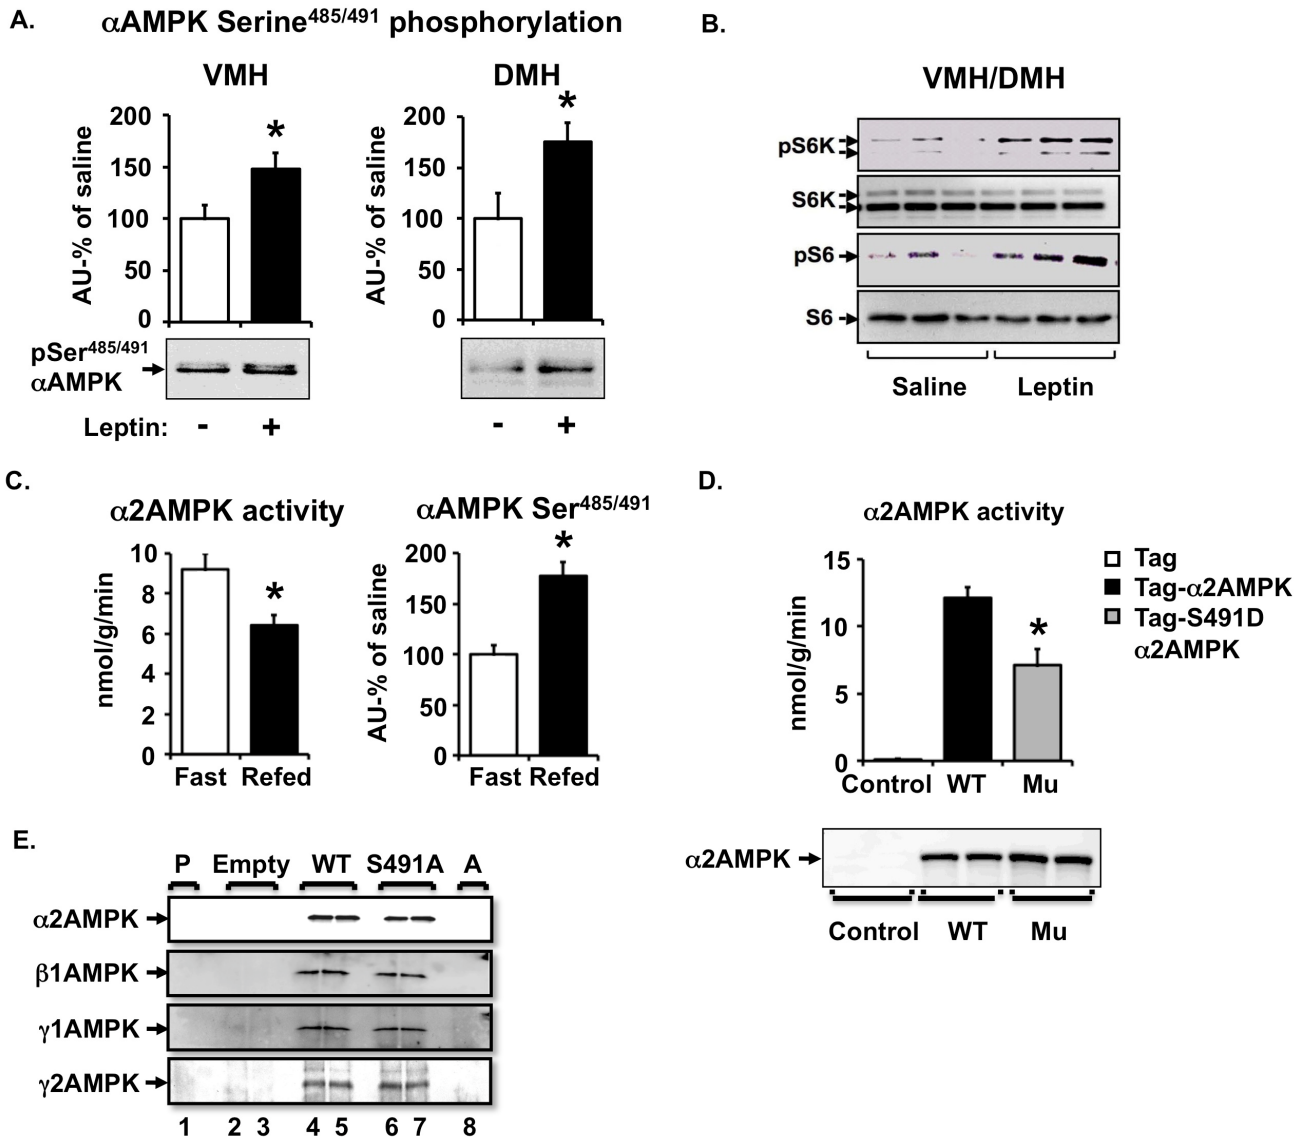

**Figure S1. Related to Figure 1**

A.  $\alpha$ AMPK serine<sup>485/491</sup>/ $\alpha$ 2AMPK was analyzed in VMH and DMH after saline or leptin injection (20 ng i.c.v.; 3h) in overnight fasted mice (n=6/group). \*p<0.05 versus saline.

- B. p70S6K and S6 phosphorylation in VMH/DMH after saline or leptin injection (20 ng i.c.v.; 3h) in overnight fasted mice used in Fig. 1A (n=3/group).
- C. Mice were fasted overnight (white bars) and refed for 6 hours (black bars). ARC extracts were analyzed for  $\alpha$ AMPK serine<sup>485/491</sup>/ $\alpha$ 2AMPK and  $\alpha$ 2AMPK activity (n=6-8/group). \*p<0.05 versus saline.
- D. GT1-7 neurons were transfected with Flag-empty (Tag), Flag-WT  $\alpha$ 2AMPK (Tag- $\alpha$ 2AMPK) or Flag-S491D- $\alpha$ 2AMPK (Tag-S491D  $\alpha$ 2AMPK) for 24 hours. Serum was removed overnight followed by glucose removal for 6 hours. Cell extracts were first analyzed for  $\alpha$ 2AMPK expression (bottom panel), then immunoprecipitated with Flag antibody and analyzed for  $\alpha$ 2AMPK activity corrected for  $\alpha$ 2AMPK protein levels (n=6/group). \*p<0.05 versus all other groups.
- E. GT1-7 neurons were transfected with Flag-empty (lanes 2-3), Flag-WT (lanes 4-5) or Flag-S491A- $\alpha$ 2AMPK (lanes 6-7) for 24 hours. Cell extracts were immunoprecipitated with Flag antibody. Controls have: (P) protein only, with no antibody (lane 1) or (A) antibody only, no cell extract (lane 8).  $\alpha$ 2AMPK,  $\beta$ 1AMPK,  $\gamma$ 1AMPK and  $\gamma$ 2AMPK subunits were detected. Data in all bar graphs are shown as means +/- SEM.

### $\alpha$ AMPK Serine<sup>485/491</sup> phosphorylation

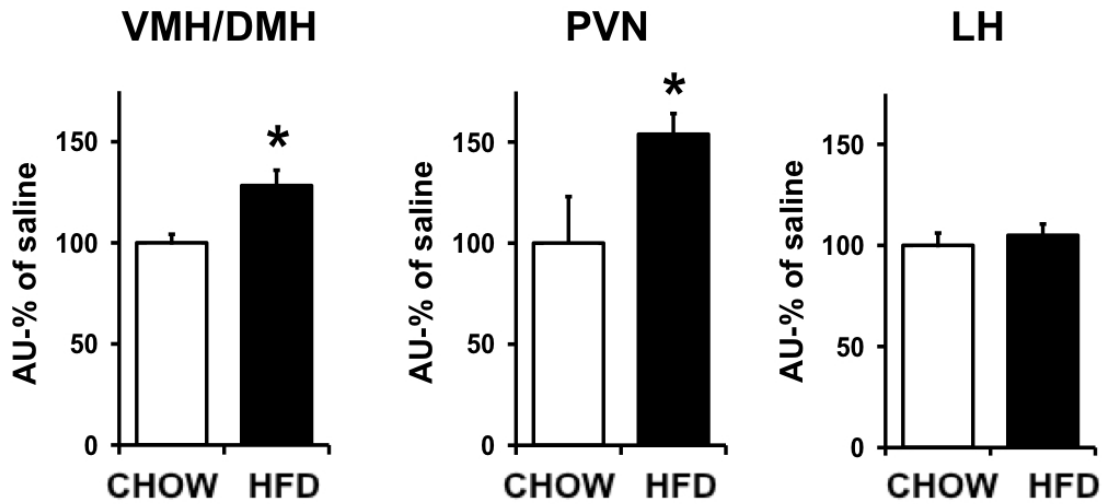

### AMPK $\alpha$ 2 activity

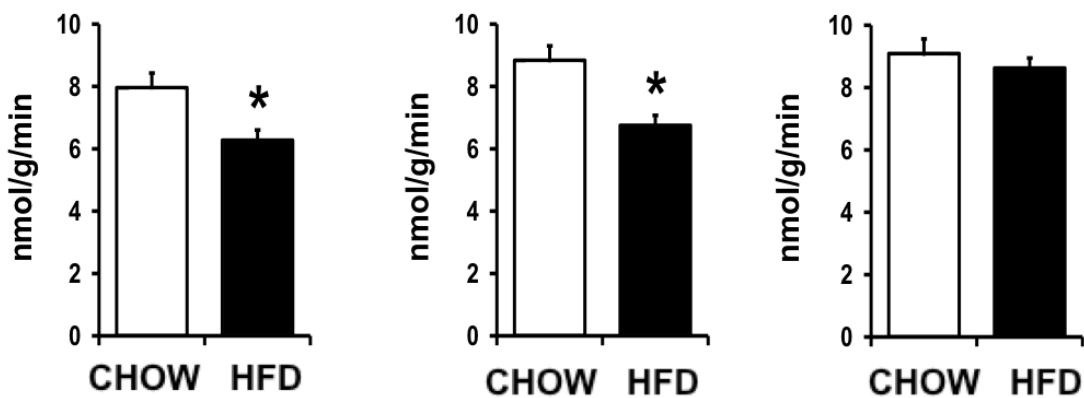

**Figure S2. Related to Figure 2**

Mice were fed chow (white bars) or a high fat diet (HFD, black bars) for 6 months and analyzed for  $\alpha$ AMPK serine<sup>485/491</sup>/ $\alpha$ 2AMPK and  $\alpha$ 2AMPK activity in the hypothalamus (n=7-9/group). \*p<0.05 versus saline.

Data are shown as means +/- SEM.

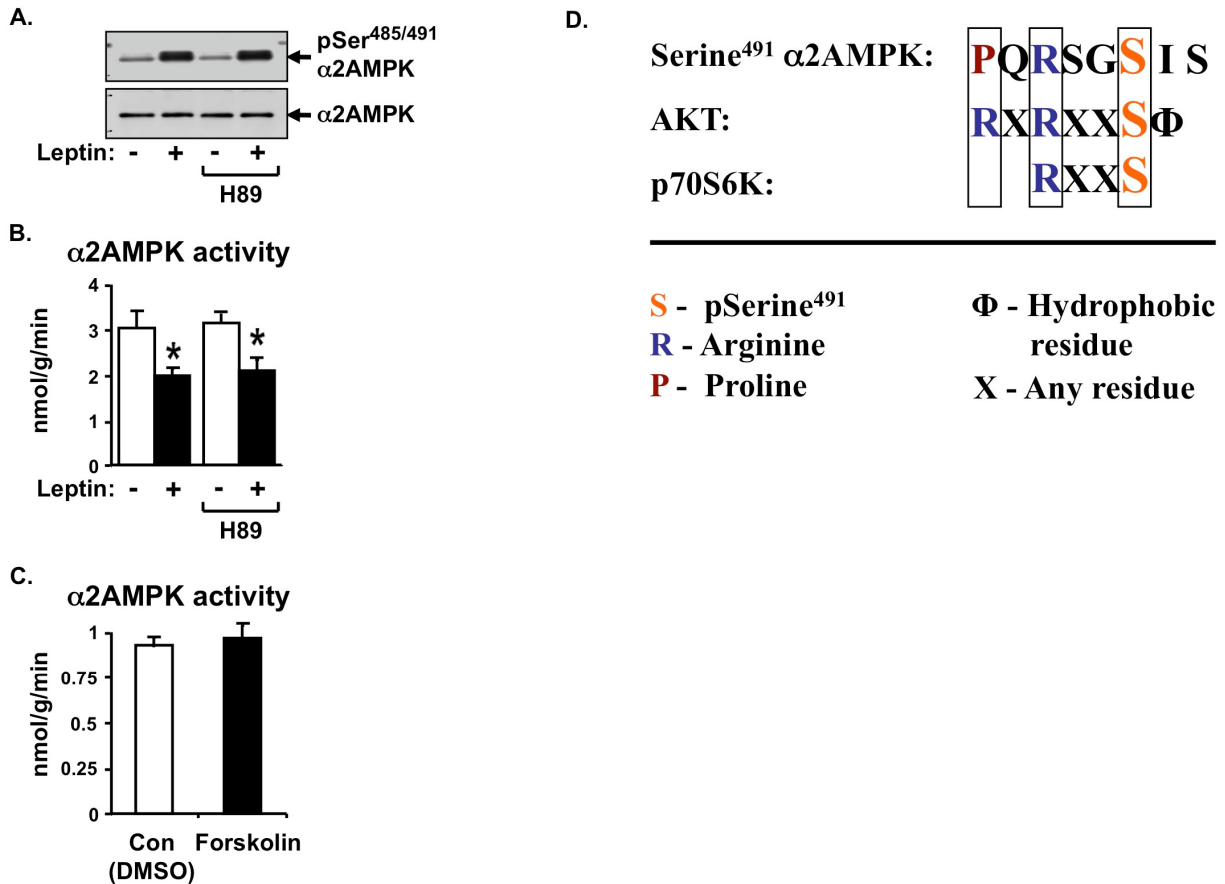

**Figure S3. Related to Figure 3**

**PKA is not involved in leptin dependent or independent regulation of AMPK serine<sup>485/491</sup> phosphorylation and inhibition of  $\alpha$ 2AMPK activity in GT1-7 neurons.**

GT1-7 neurons were treated with vehicle (H<sub>2</sub>O) or PKA inhibitor H89 (1h) followed by 0.5  $\mu$ g/ml leptin (+) or vehicle (-) for 2h in DMEM medium with 5 mM glucose. Cell extracts were (A) immunoblotted for pSerine<sup>485/491</sup> and total  $\alpha$ 2AMPK or (B) analyzed for  $\alpha$ 2AMPK activity. \**p*<0.05 versus vehicle. C. GT1-7 neurons were treated with vehicle (DMSO) or forskolin (10  $\mu$ M) for 1h in DMEM medium with 5 mM glucose and analyzed for  $\alpha$ 2AMPK activity. Data in all panels are shown as means  $\pm$  SEM.

**D. Lineup of Serine<sup>491</sup>  $\alpha$ 2AMPK phosphorylation site with the minimal motifs required for phosphorylation by AKT and p70S6K.**

Proline residue in position -5 renders Serine<sup>491</sup>  $\alpha$ 2AMPK phosphorylation site unfavorable for direct phosphorylation by AKT but acceptable for p70S6K.

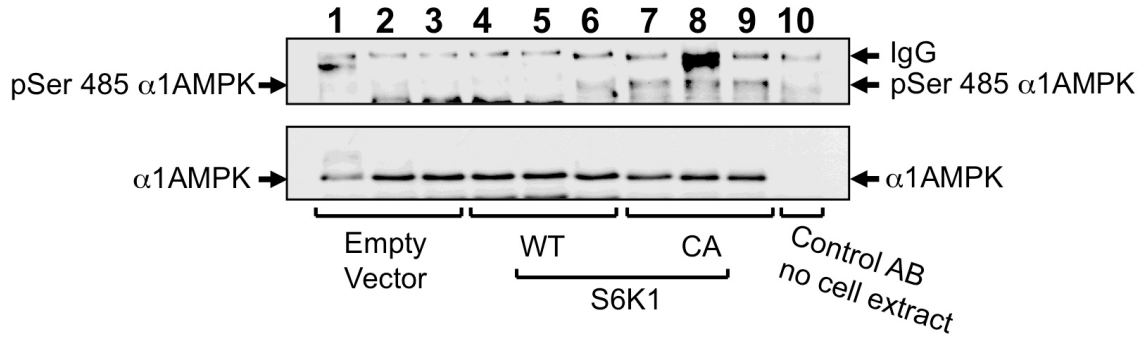

**Figure S4. Related to Figure 4**

GT1-7 neurons were transfected with Empty (lanes 1-3), WT-S6K1 (lanes 4-6) or CA-S6K1 (7-9) vectors for 24h and serum starved overnight in DMEM medium with 5 mM glucose. Cell extracts were immunoprecipitated with α1AMPK antibody (Upstate Biotechnology) and analyzed for pSerine<sup>485</sup> and α1AMPK.
